# Supplementary material for: A genetically modified minipig model for Alzheimer’s disease with SORL1 haploinsufficiency
Source: PubMed Central journal article supplement — Cell Rep Med. 2022 Sep 12;3(9):100740. doi: 10.1016/j.xcrm.2022.100740 (PMC9512670; doi:10.1016/j.xcrm.2022.100740), 2022-09-12
Supplement: mmc1.pdf [file mmc1.pdf]

**Cell Reports Medicine, Volume 3**

**Supplemental information**

**A genetically modified minipig model**

**for Alzheimer's disease**

**with *SORL1* haploinsufficiency**

**Olav M. Andersen, Nikolaj Bøgh, Anne M. Landau, Gro G. Pløen, Anne Mette G. Jensen, Giulia Monti, Benedicte P. Ulhøi, Jens R. Nyengaard, Kirsten R. Jacobsen, Margarita M. Jørgensen, Ida E. Holm, Marianne L. Kristensen, Aage Kristian O. Alstrup, Esben S.S. Hansen, Charlotte E. Teunissen, Laura Breidenbach, Mathias Droscher, Ying Liu, Hanne S. Pedersen, Henrik Callesen, Yonglun Luo, Lars Bolund, David J. Brooks, Christoffer Laustsen, Scott A. Small, Lars F. Mikkelsen, and Charlotte B. Sørensen**

## SUPPLEMENTAL INFORMATION

### List of Supplementary information:

Supplementary Tables S1-S2

Supplementary Figures S1-S6

Supplementary table S1. Animals included in the study, related to Figure 1

| Pig (ID no)                | Sex    | Genotype | Age at CSF sampling (mo) | Age at FDG-PET scan (mo) | Age at PIB-PET scan (mo) | Age at MRI scan (mo) | Age at euthanization (mo) |
|----------------------------|--------|----------|--------------------------|--------------------------|--------------------------|----------------------|---------------------------|
| <b>Cloned animals (F0)</b> |        |          |                          |                          |                          |                      |                           |
| 6304                       | Female | KO       | 33                       | -                        | -                        | -                    | 33                        |
| 6401                       | Female | HET      | 35                       | -                        | -                        | -                    | 35                        |
| 6402                       | Female | HET      | 36*                      | -                        | -                        | -                    | 36                        |
| <b>F1 offspring</b>        |        |          |                          |                          |                          |                      |                           |
| 6469                       | Female | HET      | 24                       | 21                       | 21                       | 22                   | 29                        |
| 6470                       | Female | HET      | 24                       | 21                       | 21                       | 22                   | 29                        |
| 6471                       | Male   | WT       | 18                       | -                        | -                        | -                    | 18                        |
| 6472                       | Male   | HET      | 30                       | -                        | -                        | 27                   | 30                        |
| 6473                       | Female | HET      | 5                        | -                        | -                        | -                    | 5                         |
| 6474                       | Male   | HET      | 30                       | -                        | -                        | 27                   | 30                        |
| 6475                       | Female | WT       | 24                       | 21                       | 21                       | 22                   | 29                        |
| 6476                       | Male   | HET      | 18                       | -                        | -                        | -                    | 18                        |
| 6477                       | Female | WT       | 24                       | 21                       | 21                       | 22                   | 29                        |
| 6478                       | Female | WT       | 5                        | -                        | -                        | -                    | 5                         |
| <b>WT control animals</b>  |        |          |                          |                          |                          |                      |                           |
| 334011                     | Female | WT       | 36                       | -                        | -                        | -                    | 36                        |
| 230251                     | Female | WT       | 38                       | -                        | -                        | -                    | 38                        |
| 339671                     | Male   | WT       | 17                       | -                        | -                        | -                    | 17                        |
| 339704                     | Male   | WT       | 17                       | -                        | -                        | -                    | 17                        |
| 338496                     | Male   | WT       | 29                       | -                        | -                        | 27                   | 29                        |
| 338593                     | Male   | WT       | 30                       | -                        | -                        | 27                   | 29                        |
| <b>WT breeding boars</b>   |        |          |                          |                          |                          |                      |                           |
| 229751                     | Male   | WT       | 23                       | -                        | -                        | -                    | 23                        |
| 332725                     | Male   | WT       | 22                       | -                        | -                        | -                    | 22                        |

Pigs included in the study listing age in whole months at individual procedures. A dash indicate that the procedure was not performed for the animal in question.

\* CSF from animal 6402 was contaminated with blood and not used for any analysis

Supplementary table S2. Primer sequences, related to Experimental Procedures

|                                     | Forward primer (5'-3')                                                  | Reverse primer (5'-3')                                                      |
|-------------------------------------|-------------------------------------------------------------------------|-----------------------------------------------------------------------------|
| <b>rAAV/SORL1 KO vector</b>         |                                                                         |                                                                             |
| LHA*                                | <u>atacatac</u> <i>cgggccc</i> CCTCAAAAACCCAGGGTGTGAGTCCAGAGC           | <i>gctccogcttttttcccttttag</i> CCCTGGCTGGCGGCTCCTCTGTGCCG                   |
| RHA*                                | <i>cgccctatagtgtgctgtattac</i> GCATCCATCCTTGGCTGCTGCCCTCCAGG            | <u>atacatac</u> <i>cgggccc</i> CCAAGGGTTGAACATTTAACTCTGTGATTTCC             |
| 3-Fusion*                           | <u>atacatac</u> <i>cgggccc</i> CCTCAAAAACCCAGGGTGTGAGTCCAGAGC           | <u>atacatac</u> <i>cgggccc</i> CCAAGGGTTGAACATTTAACTCTGTGATTTCC             |
| <b>CRISPR sgRNA vectors</b>         |                                                                         |                                                                             |
| sgRNA1**                            | accgGCGACACGGAGCAGCAGGA                                                 | aaacTCCTGCTGCTCCGTGTCGC                                                     |
| sgRNA2**                            | accgATGGCGCTGCTGCGCCCGC                                                 | aaacCGGGCGGCGAGCAGCGCCAT                                                    |
| <b>C-check vector</b>               |                                                                         |                                                                             |
| sgRNA1-sgRNA2 target site insert*** | <i>gtcggat</i> (GGCGACACGGAGCAGCAGGAGGGATGGCGCTGCTGCCCGGGG) <i>aggt</i> | <i>cggtacct</i> (CCCCGGGCGGCGAGCAGCGCCATCCCTCCTGCTGCTCCGTGTCGCC) <i>atc</i> |
| <b>PCR screening of donor cells</b> |                                                                         |                                                                             |
| 5' SORL1 KO PCR (F3+R3)             | CTCTAGAAGTAGTCTCTCTTCAGTCCTG                                            | GCGCATGCTCAGACTGCGCTTGG                                                     |
| 3' SORL1 KO PCR (F4+R4)             | GGTACCCAATTGCGCCATATAGTGAGTC                                            | AATGACACAATAGGCTAAGATGG                                                     |
| <b>Southern blot probes</b>         |                                                                         |                                                                             |
| SORL1 probe                         | CTGAGCTCCCCAAAGTTAGAAAGTG                                               | GCCTCTCCAGTTAACAGACCTTCC                                                    |
| neo <sup>r</sup> probe              | GAAGCCCGGCATTCTGCACGC                                                   | CAGAAGCCATAGACCCACCGCA                                                      |
| <b>Off target analysis</b>          |                                                                         |                                                                             |
| Chr. 2 ( <i>JUNB</i> )              | AGCGGTGGCGGCAGCTAC                                                      | GTACGAGCTCCGGTACCGAC                                                        |
| Chr. 2 ( <i>ARHGAP26</i> )          | AGCGCCAGGAGGCCCATG                                                      | CAAGGATGCGCTCGTTCCG                                                         |
| Chr. 5 ( <i>XRCC6</i> )             | CCGTGCCACTCACCATTACC                                                    | CAGTTCACCTGCTGACCTGGAGC                                                     |
| Chr. 6 ( <i>ISE1</i> )              | CTGAATCAGCACATGTCTGGCC                                                  | GGACTCGCCGTGAGCAG                                                           |
| Chr. 8 ( <i>PCDH7</i> )             | GAGTGGGATACGACCGATCTTGC                                                 | CGCAACAGCGCGACTCCTATG                                                       |
| Chr. 9 ( <i>HEPACAM</i> )           | CTCAGGCGCTGATCCACAG                                                     | GTGCAGACTCCAGGAGAGGTTCC                                                     |
| Chr. 14 ( <i>TXNRD2</i> )           | CCTGGAGTTTACAGCAAGGTC                                                   | GGTACCCTGAGTGAGCTTTGCTC                                                     |
| Chr. 15 ( <i>TWIST2</i> )           | AGGCATGACCAGGTATTGAG                                                    | TCACGGAGGAGCTCGGC                                                           |
| <b>Plasmid integration analysis</b> |                                                                         |                                                                             |
| sgRNA1 plasmid                      | GGACATAAGCCTGTTGGTTCC                                                   | ACGCCACGGAATGATGTCG                                                         |
| hCas9 plasmid                       | ATGGGCGGTAGGCGGTAC                                                      | GATCTCTGCGAGGTAGCAGATC                                                      |
| <b>Genotyping of piglets</b>        |                                                                         |                                                                             |
| 5' SORL1 KO PCR                     | CTCTAGAAGTAGTCTCTCTTCAGTCCTG                                            | GCGCCTACCGTGGATGTGG                                                         |
| 3' SORL1 KO PCR                     | GGTACCCAATTGCGCCATATAGTGAGTC                                            | AATGACACAATAGGCTAAGATGG                                                     |
| SORL1 WT PCR                        | CTCTAGAAGTAGTCTCTCTTCAGTCCTG                                            | CTTCGCGCACTTCTCCGCTG                                                        |
| <b>RT-PCR</b>                       |                                                                         |                                                                             |
| 5' SORL1 RT-PCR (exon 1-2, F1+R2)   | CGGACGAGAAGCGCTCCG                                                      | CAAGGCCACGATGACGTTGC                                                        |
| 5' SORL1 RT-PCR (exon 1-3, F1+R1)   | CGGACGAGAAGCGCTCCG                                                      | GCGATCACGGCTTCACTGCTG                                                       |
| 3' SORL1 RT-PCR (exon 46-47)        | GCCATGAACATCACAGCGTACC                                                  | GCTGACACATCCCTACCAGACC                                                      |
| GAPDH RT-PCR                        | GACTCATGACACCGTCCATG                                                    | GTGAGTCCACAACCGACACG                                                        |
| APP RT-PCR                          | ACCCTATGAAGAGGCCACGG                                                    | TGTTACAGAGCACACCTCTCG                                                       |
| ADAM10 RT-PCR                       | TCCTTGGTCGAACCATCAC                                                     | CTGCCCAACAATAAGCCACG                                                        |
| ADAM17 RT-PCR                       | GCAAAAGGCGTGCTTACTGC                                                    | CGAGTGGTCCGTTTCTGTTAC                                                       |
| BACE1 RT-PCR                        | TTGTGCGGTTGAGATCAAT                                                     | CATCTGGGAACCTTCCGTCGAG                                                      |
| PSEN1 RT-PCR                        | CAGAGAGCCCTGCATCAAT                                                     | GCCAGGCATGGATGACCTTAT                                                       |
| PSEN2 RT-PCR                        | GGCCATCCTCATCGTTTGT                                                     | TGTCCATGAAAGGCCGTACC                                                        |
| MAPT RT-PCR                         | CATGCTCAGGGGACTACAC                                                     | CCAAGAGTACCTTCTGCGC                                                         |
| <b>qPCR</b>                         |                                                                         |                                                                             |
| 3' SORL1                            | GCCATGAACATCACAGCGTACC                                                  | GCTGACACATCCCTACCAGACC                                                      |
| HPRT1                               | AAGCTTGCTGGTAAAAGGA                                                     | GTCAAGGGCATAGCCTACCA                                                        |

\*Underlined sequence: Not I restriction site; sequence in italics: linker for 3-fusion PCR

\*\*Lower case: overhang for BsaI cloning; upper case: porcine SORL1 target sequence

\*\*\*Nucleotides in brackets denote the overlapping target site sequences recognized by sgRNA1 and sgRNA2. Nucleotides relevant for cloning are shown in lower case.

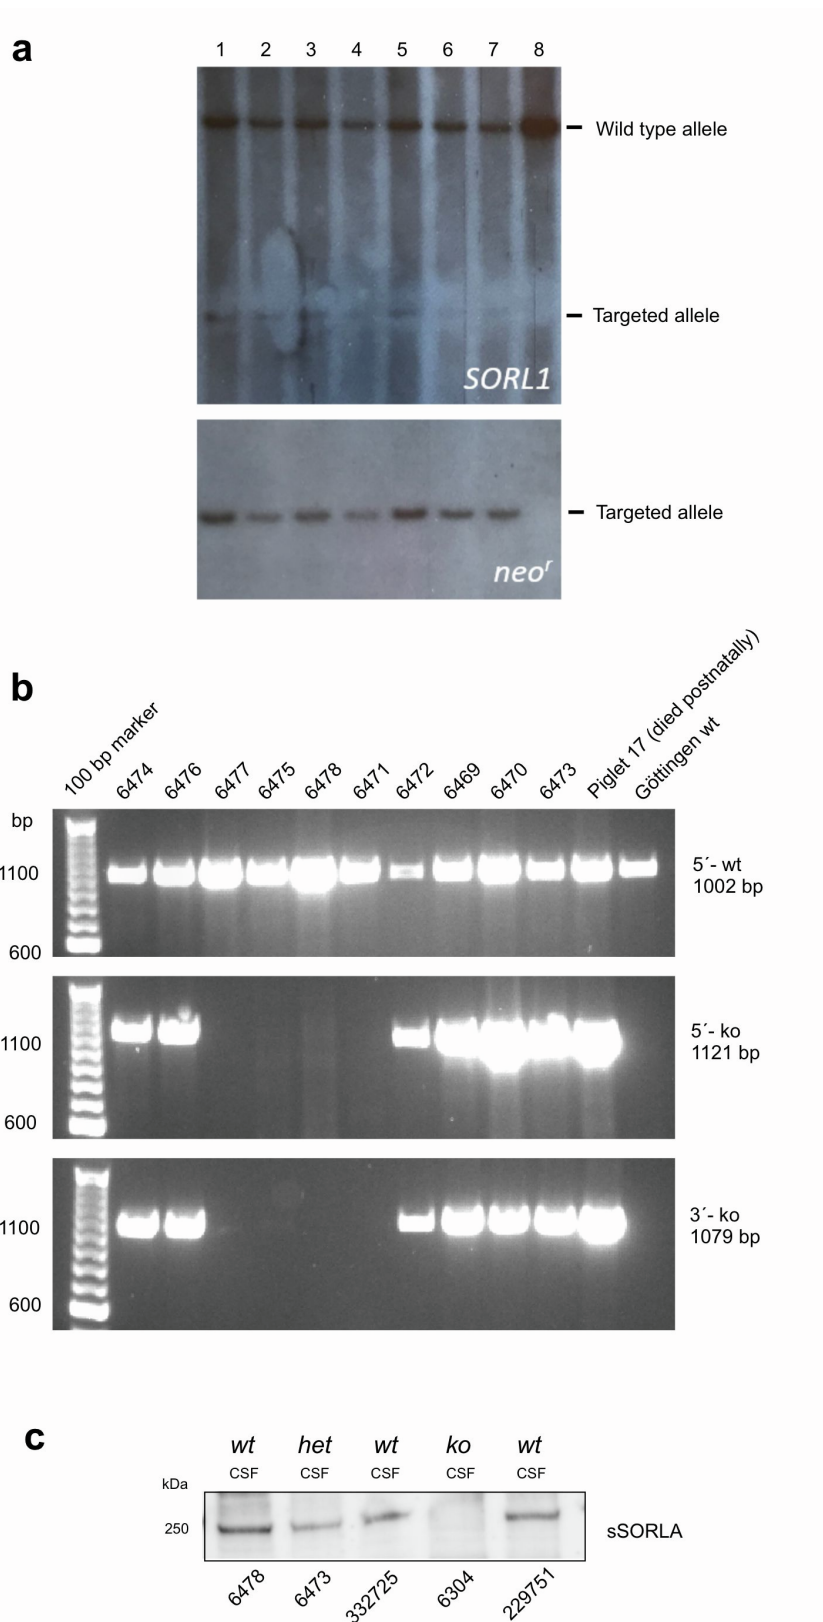

**Supplemental figure S1. Molecular biological and biochemical validation of the *SORL1* Göttingen Minipigs, related to Figure 1 and Figure 2**

a) Representative Southern blot of genomic DNA isolated from re-cloned Göttingen *SORL1* *het* minipigs. Genomic DNA was digested with *BlnI*, electrophoresed and blotted onto a nitrocellulose membrane prior to hybridization with

the *SORL1* probe resulting in an upper band (theoretical size 8.5 kb) and lower band (theoretical size 3.2 kb) representing the wild-type and targeted allele, respectively (upper panel). *BspI*-digested DNA was also hybridized with the *neo<sup>r</sup>* probe, detecting the *neo<sup>r</sup>* cassette and yielding a band (theoretical size 6.9 kb) corresponding to the targeted allele (lower panel). Lanes 1-7: Genomic DNA isolated from individual re-cloned *SORL1 het* Göttingen minipigs; Lane 8: Genomic DNA isolated from a Göttingen wild-type minipig.

b) Genotyping of F1 *SORL1* piglets. Genomic DNA was isolated from ear biopsies obtained from newborn piglets and used as template in PCR employing primer sets to amplify the wild-type or targeted *SORL1* allele. The *SORL1 KO* allele was detected by amplification of the 5'- and 3'-end of the targeted *SORL1* region, respectively. Genomic DNA, isolated from the pig fibroblasts used for re-cloning as well as from a wild-type Göttingen minipig, were used as positive controls. M; 100 bp DNA marker.

c) WB analysis of cerebrospinal fluid (CSF) isolated from a *SORL1-wt* (6478/5 mo), a *SORL1-het* (6473/5 mo) and the cloned *SORL1-ko* (6304) animal and two older control animals, (*wt* (332725)/22 mo and *wt* (229751)/23 mo), showed absent and reduced sSORLA in the CSF of the *ko* and *het* minipigs, respectively, in accordance with their individual *SORL1* genotypes (see also **Fig. 2a,d**).

|       |  |                  |             |               |             |         |                                |
|-------|--|------------------|-------------|---------------|-------------|---------|--------------------------------|
|       |  | 10               | 20          | 30            | 40          | 50      | 60                             |
| Pig   |  | MATRSSRRRESRFLFL | LMALLPFGAV  | EVVYLLGGRA    | PPQDRGLV    | LVVGD   | PRELRL                         |
| Human |  | MATRSSRRRESRFLFL | LMALLPFGAL  | EVVYTORLGGRAF | PPQDRGLV    | LVVGD   | PRELRL                         |
| Pig   |  | 70               | 80          | 90            | 100         | 110     | 120                            |
| Human |  | GAACRFRG         | ADEKPLRRKRS | AALQPEPI      | VYGVSLNDSHN | QMVVH   | AGEKSNVIVAL                    |
| Pig   |  | 130              | 140         | 150           | 160         | 170     | 180                            |
| Human |  | ARDSL            | LARPS       | SDVYVSDYGR    | SFKRIS      | KLNFQ   | CNSSEAVIAQFYHSPADNKRYIFA       |
| Pig   |  | 190              | 200         | 210           | 220         | 230     | 240                            |
| Human |  | DAYAQY           | LVVTFDFC    | NTLQGF        | SIPFRAAD    | LLH     | SKASNLLGFRDRSHPNQLWKSDDFGQT    |
| Pig   |  | 250              | 260         | 270           | 280         | 290     | 300                            |
| Human |  | WIMIQEHV         | KFSFSG      | VDYDKP        | NTIY        | VERHEP  | SGYSTVFRSTDFPQSGREN            |
| Pig   |  | 310              | 320         | 330           | 340         | 350     | 360                            |
| Human |  | QLRDKY           | MFATKVV     | HLGSG         | SSVOLW      | SFGRKPM | RAAQFVTRHPIN                   |
| Pig   |  | 370              | 380         | 390           | 400         | 410     | 420                            |
| Human |  | FVCVSH           | NNRNTN      | LISEA         | BGLF        | SLSLEN  | VLYSPGGAGSDTLVRYFANEFPADFRHVEG |
| Pig   |  | 430              | 440         | 450           | 460         | 470     | 480                            |
| Human |  | LQGVY            | IATLINGS    | MNEEN         | MRSVIT      | FDKGGT  | WEFLQAPAF                      |
| Pig   |  | 490              | 500         | 510           | 520         | 530     | 540                            |
| Human |  | RLSQ             | LLQLRR      | PILS          | KEA         | PGLI    | IATG                           |
| Pig   |  | 550              | 560         | 570           | 580         | 590     | 600                            |
| Human |  | YTWGD            | HGII        | ALAQ          | GMET        | NELK    | YSTN                           |
| Pig   |  | 610              | 620         | 630           | 640         | 650     | 660                            |
| Human |  | FSGN             | KEN         | HS            | WLLQ        | VN      | TDAL                           |
| Pig   |  | 670              | 680         | 690           | 700         | 710     | 720                            |
| Human |  | CFNG             | ED          | FR            | PVV         | NS      | CS                             |
| Pig   |  | 730              | 740         | 750           | 760         | 770     | 780                            |
| Human |  | STYR             | RR          | TR            | G           | YR      | KIS                            |
| Pig   |  | 790              | 800         | 810           | 820         | 830     | 840                            |
| Human |  | EQL              | PL          | T             | G           | L       | R                              |
| Pig   |  | 850              | 860         | 870           | 880         | 890     | 900                            |
| Human |  | EPL              | S           | Q             | L           | L       | Y                              |
| Pig   |  | 910              | 920         | 930           | 940         | 950     | 960                            |
| Human |  | PGI              | YR          | S             | N           | M       | D                              |
| Pig   |  | 970              | 980         | 990           | 1000        | 1010    | 1020                           |
| Human |  | LPH              | Y           | A             | I           | A       | V                              |
| Pig   |  | 1030             | 1040        | 1050          | 1060        | 1070    | 1080                           |
| Human |  | ACV              | R           | P             | C           | S       | L                              |
| Pig   |  | 1090             | 1100        | 1110          | 1120        | 1130    | 1140                           |
| Human |  | RN               | Q           | Y             | R           | C       | S                              |
| Pig   |  | 1150             | 1160        | 1170          | 1180        | 1190    | 1200                           |
| Human |  | LEDD             | C           | G             | N           | S       | D                              |
| Pig   |  | 1210             | 1220        | 1230          | 1240        | 1250    | 1260                           |
| Human |  | EASN             | F           | Q             | C           | N       | G                              |
| Pig   |  | 1270             | 1280        | 1290          | 1300        | 1310    | 1320                           |
| Human |  | DC               | D           | G             | S           | D       | E                              |
| Pig   |  | 1330             | 1340        | 1350          | 1360        | 1370    | 1380                           |
| Human |  | EFH              | K           | V             | C           | D       | E                              |
| Pig   |  | 1390             | 1400        | 1410          | 1420        | 1430    | 1440                           |
| Human |  | HC               | I           | P             | N           | R       | K                              |
| Pig   |  | 1450             | 1460        | 1470          | 1480        | 1490    | 1500                           |
| Human |  | G                | R           | D             | C           | A       | G                              |
| Pig   |  | 1510             | 1520        | 1530          | 1540        | 1550    | 1560                           |
| Human |  | G                | D           | E             | A           | N       | C                              |
| Pig   |  | 1570             | 1580        | 1590          | 1600        | 1610    | 1620                           |
| Human |  | N                | L           | Q             | W           | A       | D                              |
| Pig   |  | 1630             | 1640        | 1650          | 1660        | 1670    | 1680                           |
| Human |  | D                | T           | T             | Y           | Q       | V                              |
| Pig   |  | 1690             | 1700        | 1710          | 1720        | 1730    | 1740                           |
| Human |  | H                | G           | L             | I           | R       | E                              |
| Pig   |  | 1750             | 1760        | 1770          | 1780        | 1790    | 1800                           |
| Human |  | I                | T           | T             | K           | G       | V                              |
| Pig   |  | 1810             | 1820        | 1830          | 1840        | 1850    | 1860                           |
| Human |  | G                | S           | M             | L           | S       | H                              |
| Pig   |  | 1870             | 1880        | 1890          | 1900        | 1910    | 1920                           |
| Human |  | E                | C           | T             | W           | G       | R                              |
| Pig   |  | 1930             | 1940        | 1950          | 1960        | 1970    | 1980                           |
| Human |  | S                | S           | Y             | V           | V       | V                              |
| Pig   |  | 1990             | 2000        | 2010          | 2020        | 2030    | 2040                           |
| Human |  | S                | Y           | K             | V           | S       | R                              |
| Pig   |  | 2050             | 2060        | 2070          | 2080        | 2090    | 2100                           |
| Human |  | V                | L           | L             | F           | W       | K                              |
| Pig   |  | 2110             | 2120        | 2130          | 2140        | 2150    | 2160                           |
| Human |  | A                | C           | L             | F           | G       | I                              |
| Pig   |  | 2170             | 2180        | 2190          | 2200        | 2210    | 2220                           |
| Human |  | Y                | T           | K             | H           | R       | L                              |

Supplemental figure S2. Alignment of human and pig SORLA protein sequences, related to Figure 2

SORLA identity 92.2% (2043/2216)

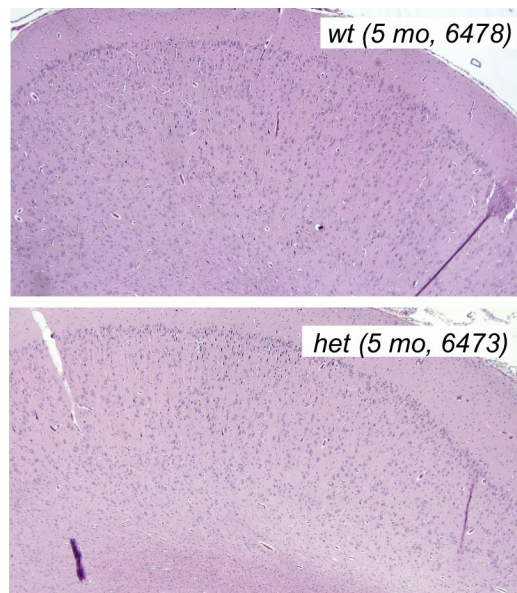

**Supplemental figure S3. Histopathology of young *SORL1-het* and *SORL1-wt* Göttingen Minipigs, related to Figure 2**

Histological examination of hematoxylin-stained frontal cortex from 5-month old *wt* (6478) and *het* (6473) *SORL1* minipigs showing no detectable difference in neuronal layering and numbers.

|       |  |                                                              |                                                        |                  |                  |           |      |
|-------|--|--------------------------------------------------------------|--------------------------------------------------------|------------------|------------------|-----------|------|
|       |  | 10                                                           | 20                                                     | 30               | 40               | 50        | 60   |
| Pig   |  | MLPGLALV                                                     | LLAAWTARALEVPTDGNAGLLAE                                | PQVAMFCGK        | LNMHMNVQNGKWE    | ESDP      | SGTK |
| Human |  | MLPGLALL                                                     | LLAAWTARALEVPTDGNAGLLAE                                | PQIAMFCGR        | LNMHMNVQNGKWD    | ESDP      | SGTK |
|       |  | 70                                                           | 80                                                     | 90               | 100              | 110       | 120  |
| Pig   |  | TCIGTK                                                       | EGILQYCYQEVYPELQITNVVEANQPVTIQNWCKR                    | SRKQCKTH         | THV              | VIPYRCLVG |      |
| Human |  | TCIDTK                                                       | EGILQYCYQEVYPELQITNVVEANQPVTIQNWCKR                    | GRKQCKTH         | PHV              | VIPYRCLVG |      |
|       |  | 130                                                          | 140                                                    | 150              | 160              | 170       | 180  |
| Pig   |  | EFVSDALLVPDKCKFLHQERMDVCETHLHWHTVAKETCSEKSTNLHDYGMLLPCGIDKFR |                                                        |                  |                  |           |      |
| Human |  | EFVSDALLVPDKCKFLHQERMDVCETHLHWHTVAKETCSEKSTNLHDYGMLLPCGIDKFR |                                                        |                  |                  |           |      |
|       |  | 190                                                          | 200                                                    | 210              | 220              | 230       | 240  |
| Pig   |  | GVEFVCCPLAEESDN                                              | IDSADAEEDSDVWVGGADTDYADGSEDKVVEVAEEEEVAD               | VEEEE            |                  |           |      |
| Human |  | GVEFVCCPLAEESDN                                              | VDSADAEEDSDVWVGGADTDYADGSEDKVVEVAEEEEVAE               | VEEEE            |                  |           |      |
|       |  | 250                                                          | 260                                                    | 270              | 280              | 290       | 300  |
| Pig   |  | EA                                                           | EDDEDGDEVEEEAEPEYEATER                                 | TTSIATTTTTTTTESV | EEVREVCSEQAETGPC |           |      |
| Human |  | EAD                                                          | DDDEDGDEVEEEAEPEYEATER                                 | TTSIATTTTTTTTESV | EEVREVCSEQAETGPC |           |      |
|       |  | 310                                                          | 320                                                    | 330              | 340              | 350       | 360  |
| Pig   |  | RAMISRWFYFDVTEGKCAPFFYGGCGGNRRNFDTEEYCM                      | AVCGSVMSQSLLK                                          | TQEHLP           | QD               |           |      |
| Human |  | RAMISRWFYFDVTEGKCAPFFYGGCGGNRRNFDTEEYCM                      | AVCGSAMSQSLLK                                          | TQEPL            | ARD              |           |      |
|       |  | 370                                                          | 380                                                    | 390              | 400              | 410       | 420  |
| Pig   |  | PVKLP                                                        | TAASTPDAVDKYLETPGDENEHAHFQKAKERLEAKHRERMSQVMREWEERQA   |                  |                  |           |      |
| Human |  | PVKLP                                                        | TAASTPDAVDKYLETPGDENEHAHFQKAKERLEAKHRERMSQVMREWEERQA   |                  |                  |           |      |
|       |  | 430                                                          | 440                                                    | 450              | 460              | 470       | 480  |
| Pig   |  | KNLPKADKKAVIQHFQEKVESLEQEAANERQQLVETHMARVEAMLNDRRRLALENYITAL |                                                        |                  |                  |           |      |
| Human |  | KNLPKADKKAVIQHFQEKVESLEQEAANERQQLVETHMARVEAMLNDRRRLALENYITAL |                                                        |                  |                  |           |      |
|       |  | 490                                                          | 500                                                    | 510              | 520              | 530       | 540  |
| Pig   |  | QAVPPRPRHVFNMLKKYVRAEQKDRQHTLKHFEHVRMVDPKKAAQIRSQVMTHLRVIYER |                                                        |                  |                  |           |      |
| Human |  | QAVPPRPRHVFNMLKKYVRAEQKDRQHTLKHFEHVRMVDPKKAAQIRSQVMTHLRVIYER |                                                        |                  |                  |           |      |
|       |  | 550                                                          | 560                                                    | 570              | 580              | 590       | 600  |
| Pig   |  | MNQSL                                                        | SLLYNVPAVAEEIQDEVDELLOKEQNYSDVLANMISEPRISYGNDALMPSLTET |                  |                  |           |      |
| Human |  | MNQSL                                                        | SLLYNVPAVAEEIQDEVDELLOKEQNYSDVLANMISEPRISYGNDALMPSLTET |                  |                  |           |      |
|       |  | 610                                                          | 620                                                    | 630              | 640              | 650       | 660  |
| Pig   |  | KTTVELLPVNGEFSLDDLQPW                                        | HFFGVDSVPANTENEVEPVDARPAADRGLTTRPGSGLTN                |                  |                  |           |      |
| Human |  | KTTVELLPVNGEFSLDDLQPW                                        | HFFGADSVANTENEVEPVDARPAADRGLTTRPGSGLTN                 |                  |                  |           |      |
|       |  | 670                                                          | 680                                                    | 690              | 700              | 710       | 720  |
| Pig   |  | IKTEEI                                                       | SEVKMDAEFRHDSGYEVVHHQKLVFFAEDVGSNKGAI                  | IGLMVG           | GVVIA            | TVIVITL   |      |
| Human |  | IKTEEI                                                       | SEVKMDAEFRHDSGYEVVHHQKLVFFAEDVGSNKGAI                  | IGLMVG           | GVVIA            | TVIVITL   |      |
|       |  | 730                                                          | 740                                                    | 750              | 760              | 770       |      |
| Pig   |  | VMLKKKQYTSIHHGVVEVDAAVTPEERHLSKMQQNGYENPTYKFFEQMQN           |                                                        |                  |                  |           |      |
| Human |  | VMLKKKQYTSIHHGVVEVDAAVTPEERHLSKMQQNGYENPTYKFFEQMQN           |                                                        |                  |                  |           |      |

**Supplemental figure S4. Alignment of human and porcine APP protein sequences, related to Figure 3**

APP identity 97.8% (753/770)

The 42 amino acid sequence of APP corresponding to the A $\beta$  peptide is 100% conserved (shown in red letters).



**a**

|       |                   |          |           |         |         |                        |
|-------|-------------------|----------|-----------|---------|---------|------------------------|
|       | 10                | 20       | 30        | 40      | 50      | 60                     |
| Pig   | MAEPRQEF          | TVMEDHA  | -----     | QGDTLL  | QDHEGD  | VDHSLKESPLQTP          |
| Human | MAEPRQEF          | TVMEDHAG | TYGLGDRKD | QGGYTM  | HQDQEGD | TDAGLKESPLQTP          |
|       | 70                | 80       | 90        | 100     | 110     | 120                    |
| Pig   | SETSDAKSTPTAE     | GDSWWF   | PDVTAPLV  | DEGAPGE | QAAAQP  | TEIPEGTTAEEAGIGDTPN    |
| Human | SETSDAKSTPTAE     | -----    | DVTAPLV   | DEGAPGK | QAAAQP  | TEIPEGTTAEEAGIGDTPS    |
|       | 130               | 140      | 150       | 160     | 170     | 180                    |
| Pig   | LEDQAAGHVTQARMVSK | GKDGTF   | DDKK      | TKGADGK | PGSKI   | ATPRGAAPPQKGFANATRI    |
| Human | LEDEAAGHVTQARMVSK | SKDGTG   | SDDKK     | AKGADGK | ---     | TKIATPRGAAPPQKGFANATRI |
|       | 190               | 200      | 210       | 220     | 230     | 240                    |
| Pig   | PAKTT             | PSPK     | TPPG      | SGES    | CGKSGDR | SGYSSPGSPGTPGSR        |
| Human | PAKTT             | PPA      | PKTPP     | SSGEP   | PKSGDR  | SGYSSPGSPGTPGSR        |
|       | 250               | 260      | 270       | 280     | 290     | 300                    |
| Pig   | PPKSPS            | AAKSRL   | QTAP      | CPMPDL  | KNVRS   | KIGSTENLKHQPGGK        |
| Human | PPKSPS            | AAKSRL   | QTAP      | VPMPDL  | KNVRS   | KIGSTENLKHQPGGK        |
|       | 310               | 320      | 330       | 340     | 350     | 360                    |
| Pig   | GSKDNI            | KHVP     | GGGS      | VQIVYK  | PVDLS   | SKVTSKCGSLGNIH         |
| Human | GSKDNI            | KHVP     | GGGS      | VQIVYK  | PVDLS   | SKVTSKCGSLGNIH         |
|       | 370               | 380      | 390       | 400     | 410     | 420                    |
| Pig   | SKIGSL            | DNITHV   | PGG       | GKNIETH | KLTFRE  | NAKAKTDHGAEIVYK        |
| Human | SKIGSL            | DNITHV   | PGG       | GKNIETH | KLTFRE  | NAKAKTDHGAEIVYK        |
|       | 430               | 440      | 450       |         |         |                        |
| Pig   | SSTGS             | IDMVD    | SPQL      | ATL     | LADE    | VSVASLAKQGL            |
| Human | SSTGS             | IDMVD    | SPQL      | ATL     | LADE    | VSVASLAKQGL            |

**b**

Tau (MSD)  
 $P=0.0431$

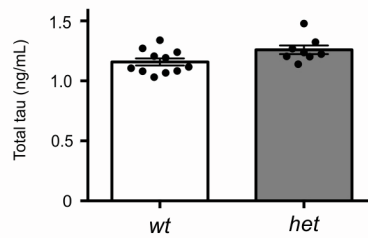**c**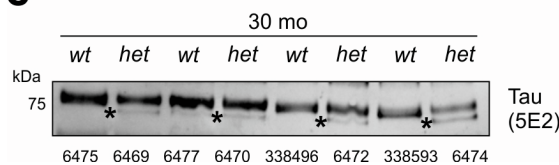

### Supplemental figure S5. Total tau measurements in *SORL1* Göttingen Minipigs, related to Figure 3

a) Alignment of human and porcine tau protein sequences. Tau identity 89.8%

b) Quantification of total tau using MSD for the mouse tau protein in CSF from *het* (n=8) and age-matched *wt* (n=11)

*SORL1* Göttingen Minipigs. Average age of the two groups of pigs were similar. The group of *het* minipigs has higher ( $P=0.0431$ ) total-tau ( $1.26\pm 0.036$  ng/ml) than *wt* *SORL1* minipigs ( $1.16\pm 0.030$  ng/ml). Two-tailed unpaired Student's t

test was used for the statistical analysis, with *P*-values below 0.05 considered significantly changed. Data are expressed as mean  $\pm$  SEM.

c) Western blot analysis for CSF isolated from *wt* and *het SORL1* minipigs (29-30 mo old) using the 5E2 anti-tau antibody (as shown in **Fig. 3g**) focusing on a high-molecular tau isoform (band marked by *asterisk*) which seems to appear in the CSF from the *SORL1-het* animals. CSFs for this analysis were isolated from the animals immediately prior to euthanization at the age of 29-30 month. Identification numbers are provided below each lane.

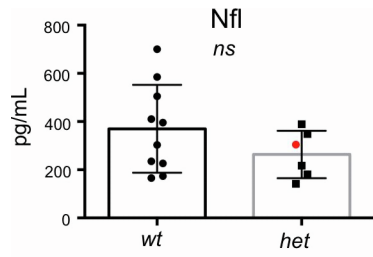

**Supplemental figure S6. Normal neuronal integrity in *SORL1-het* and *SORL1-wt* Göttingen Minipigs, related to Figure 7**

Biochemical assessment of neuronal degradation as measured by neurofilament light chain (NF-L) in collected *SORL1* minipig CSFs (*wt*, n=10; *het*, n=5; *ko*, n=1). The group of *het* minipigs were depicted including data obtained from the *ko* pig 6304 shown in red. Two-tailed unpaired Student's t test was used for the statistical analyses, with *P*-values below 0.05 considered significantly changed. Data are expressed as mean  $\pm$  SEM.
